# Supplementary material for: Disposable microfluidic device with ultraviolet detection for highly resolved screening of illicit drugs
Source: Royal Society of Chemistry journal article supplement (doi:10.1039/b906434f), 2009-01-01
Supplement: b906434f.pdf [file b906434f.pdf]

## **Disposable microfluidic device with ultraviolet detection for highly resolved screening of illicit drugs**

**Wei Qiang,<sup>a</sup> Chun Zhai,<sup>a</sup> Jianping Lei,<sup>a</sup> Chaojin Song,<sup>b</sup> Daming Zhang,<sup>b</sup> Jin Sheng<sup>a</sup> and Huangxian Ju<sup>\*a</sup>**

[a] Key Laboratory of Analytical Chemistry for Life Science (Ministry of Education of China), Department of Chemistry, Nanjing University, Nanjing 210093, China. Te./ Fax: +86-25-83593593; E-mail: hxju@nju.edu.cn.

[b] Beijing Municipal Public Security Bureau, Beijing 100085, China.

**Table S1** Results of three interference experiments

| Calmative drugs                   |                           |                       | Abstinence drugs            |                           |                       | Opiate drugs           |                           |                       |
|-----------------------------------|---------------------------|-----------------------|-----------------------------|---------------------------|-----------------------|------------------------|---------------------------|-----------------------|
| analyte/interference <sup>a</sup> | <i>t</i> <sub>M</sub> (s) | <i>R</i> <sub>s</sub> | analyte/interference        | <i>t</i> <sub>M</sub> (s) | <i>R</i> <sub>s</sub> | analyte/interference   | <i>t</i> <sub>M</sub> (s) | <i>R</i> <sub>s</sub> |
| amobarbital                       | 77.2                      |                       | caffeine                    | 62.2                      |                       | MOR                    | 86.5                      |                       |
| amobarbital/MOR                   | 83.7 <sup>b</sup>         | 1.21                  | caffeine/diphenoxylate      | 69.4                      | 1.15                  | MOR/6-AM               | 110.3                     | 4.58                  |
| MOR/barbital                      | 102.1                     | 1.69                  | diphenoxylate/MOR           | 85.9                      | 5.29                  | 6-AM/codeine           | 121.6                     | 2.16                  |
| barbital/6-AM                     | 109.2                     | 1.48                  | MOR/6-AM                    | 110.3                     | 4.61                  | codeine/acetylcodeine  | 127.4                     | 1.21                  |
| 6-AM/ketamine                     | 135.2                     | 4.73                  | 6-AM/ketamine               | 137.6                     | 4.86                  | acetylcodeine/ketamine | 137.5                     | 2.08                  |
| ketamine/amprazolam               | 144.7                     | 2.03                  | ketamine/heroin             | 151.4                     | 1.87                  | ketamine/heroin        | 150.9                     | 1.81                  |
| amprazolam/heroin                 | 150.4                     | 1.25                  | heroin/ephedrine            | 161.5                     | 1.59                  | heroin/narcotine       | 157.1                     | 1.10                  |
| heroin/ephedrine                  | 160.3                     | 1.96                  | ephedrine/MDA               | 182.2                     | 4.42                  | narcotine/ephedrine    | 162.4                     | 2.8                   |
| ephedrine/estazolam               | 166.2                     | 1.32                  | MDA/MDMA                    | 187.3                     | 1.27                  | ephedrine/pholcodine   | 167.3                     | 1.10                  |
| estazolam/nitrazepam              | 171.6                     | 1.13                  | MDMA/pethidine              | 201.7                     | 3.84                  | pholcodine/MDA         | 184.6                     | 3.87                  |
| nitrazepam/diazepam               | 177.3                     | 1.23                  | pethidine/lofexidine        | 207.6                     | 1.39                  | MDA/MDMA               | 189.7                     | 1.25                  |
| diazepam/MDA                      | 185.2                     | 1.30                  | lofexidine/ $\Delta^9$ -THC | 222.7                     | 3.99                  | MDMA/ $\Delta^9$ -THC  | 218.9                     | 6.24                  |
| MDA/MDMA                          | 190.6                     | 1.25                  |                             |                           |                       |                        |                           |                       |
| MDMA/ $\Delta^9$ -THC             | 220.1                     | 6.20                  |                             |                           |                       |                        |                           |                       |

<sup>a</sup> between two adjacent analytes, interferences or analyte and interference. <sup>b</sup> the value of *t*<sub>M</sub> for the second drug
